# Supplementary material for: Pancreatic stellate cells contribute pancreatic cancer pain via activation of sHH signaling pathway
Source: PubMed Central journal article supplement (PMC4951278; doi:10.18632/oncotarget.7776), 2016-02-27
Supplement: oncotarget-07-18146-s001.pdf [file oncotarget-07-18146-s001.pdf]

# Pancreatic stellate cells contribute pancreatic cancer pain via activation of SHH signaling pathway

## Supplementary Materials

### Real-time PCR

Total RNA was extracted using TRIzol (Invitrogen, CA, USA), and cDNA was synthesized using a Prime Script RT reagent Kit (TaKaRa, Dalian, China). The real-time experiments were conducted on an iQ5 Multicolor Real-Time PCR Detection System (Bio-Rad, Hercules, CA) using a SYBR Green Real-time PCR Master Mix (TaKaRa, CA, USA). The primers used for SYBR Green RT-qPCR are shown in Supplementary Table 1.

### Western blotting analysis

Cells were extracted in lysis buffer [50 mM Tris (pH7.5), 150 mM NaCl, 1% NP 40, 0.5% sodium deoxycholate, 1 mM EDTA, and 0.1% SDS] containing a protease inhibitor cocktail (Sigma–Aldrich), and protein concentrations were measured with the DC Protein Assay (Bio-Rad Laboratories, Inc., Hercules, CA, USA). After separation on 7.5% SDS-polyacrylamide gels, proteins were transferred to nitrocellulose membranes (Amersham Bioscience), which were then incubated with primary antibodies at 4°C overnight. After washing 3 times, the membranes were incubated with horseradish peroxidase-conjugated secondary antibodies for 1 h. Immunoreactive bands were visualized using an enhanced chemiluminescence kit (Millipore, MA, USA).

### Immunofluorescence

TRPV1, SP, and CGRP were localized to DRG, and NGF, BDNF, and GDNF were localized in PSCs

by immunofluorescence. The prepared DRG and PSCs were washed 3 times with PBS and then fixed with 100 ml 4% paraformaldehyde in PBS. The cells were permeabilized in blocking buffer (0.1% Triton X-100 or 0.1–0.5% saponin, 10% NGS, 100 mM PBS, pH 7.4) for 1 hour at room temperature and then incubated with primary antibodies overnight at 4°C. The second day, cells were washed and incubated with FITC-conjugated goat anti-rabbit or anti-mouse IgG (1:500, Jackson ImmunoResearch, West Grove, PA) for 1 hour at room temperature.

### Electrophysiological recordings

Recordings of TRPV1 currents were obtained in DRG neurons using whole-cell patch-clamp techniques. The details were shown in Supplementary methods. Whole-cell voltage-clamp recordings were performed at RT(20–22°C) with an EPC-9 amplifier (HEKA Elektronik, Lambrecht/Pfalz, Germany). After DRG neurons were prepared, microelectrodes were pulled by a P97 puller (Sutter Instruments, Novato, CA, USA). The extracellular solution for patch clamping was Dulbecco's phosphate buffer containing 150 mM NaCl, 5 mM KCl, 2 mM CaCl<sub>2</sub>, 1 mM MgCl<sub>2</sub>, 10 mM HEPES, and 10 mM glucose, pH 7.4. The pipette solution contained 140 mM KCl, 5 mM NaCl, 1 mM MgCl<sub>2</sub>, 0.5 mM CaCl<sub>2</sub>, 5 mM EGTA, 3 mM Na<sub>2</sub>-ATP, and 10 mM HEPES, pH 7.2. Data acquisition was controlled by Pulse and Pulse fit 8.5 software (HEKA Elektronik).

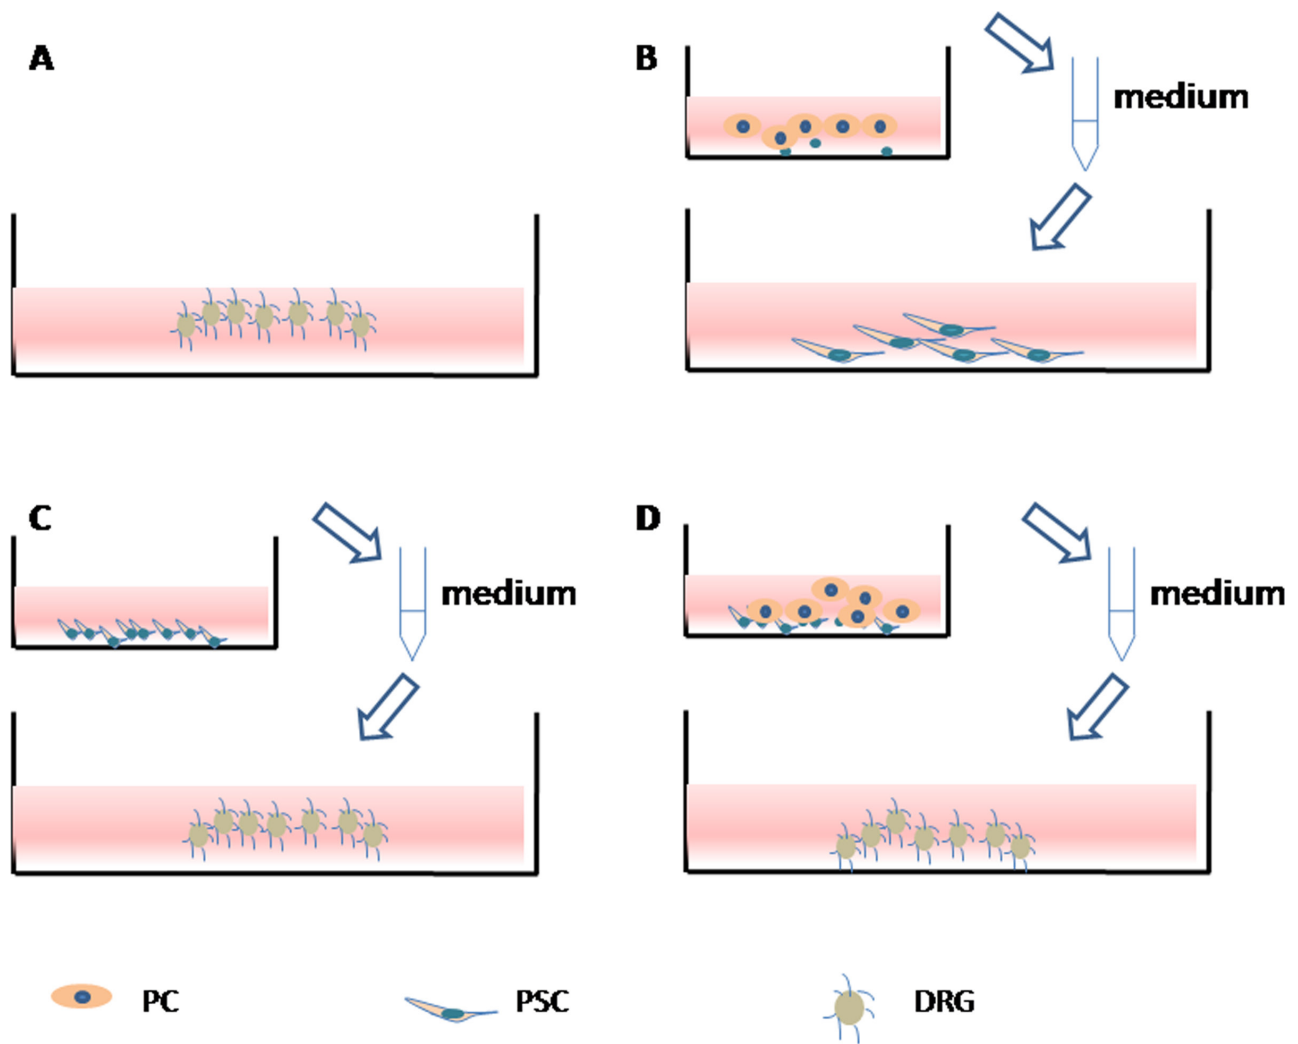

**Supplementary Figure S1: Different co-culture system for PC cells, PSCs, and DRG.** (A) DRG was cultured in DMEM/F12 (1:1) alone. (B) PSCs were indirectly co-cultured with PC cells. After PC cells and PSCs grew 24 h in 2 ml medium, 1 ml medium was removed from PSCs and replaced with 1 ml medium from PC cells. (C) PSCs were indirectly co-cultured with DRG. After PSCs and DRG grew 24 h in 2 ml medium, 1 ml DRG medium was removed and replaced with 1 ml of PSC medium. (D) DRG was indirectly co-cultured with PSCs and PC cells. After PSCs and DRG were cultured together for 24 h in 2 ml medium, 1 ml DRG medium was removed and replaced with 1 ml of co-cultured PC cells and PSCs medium.

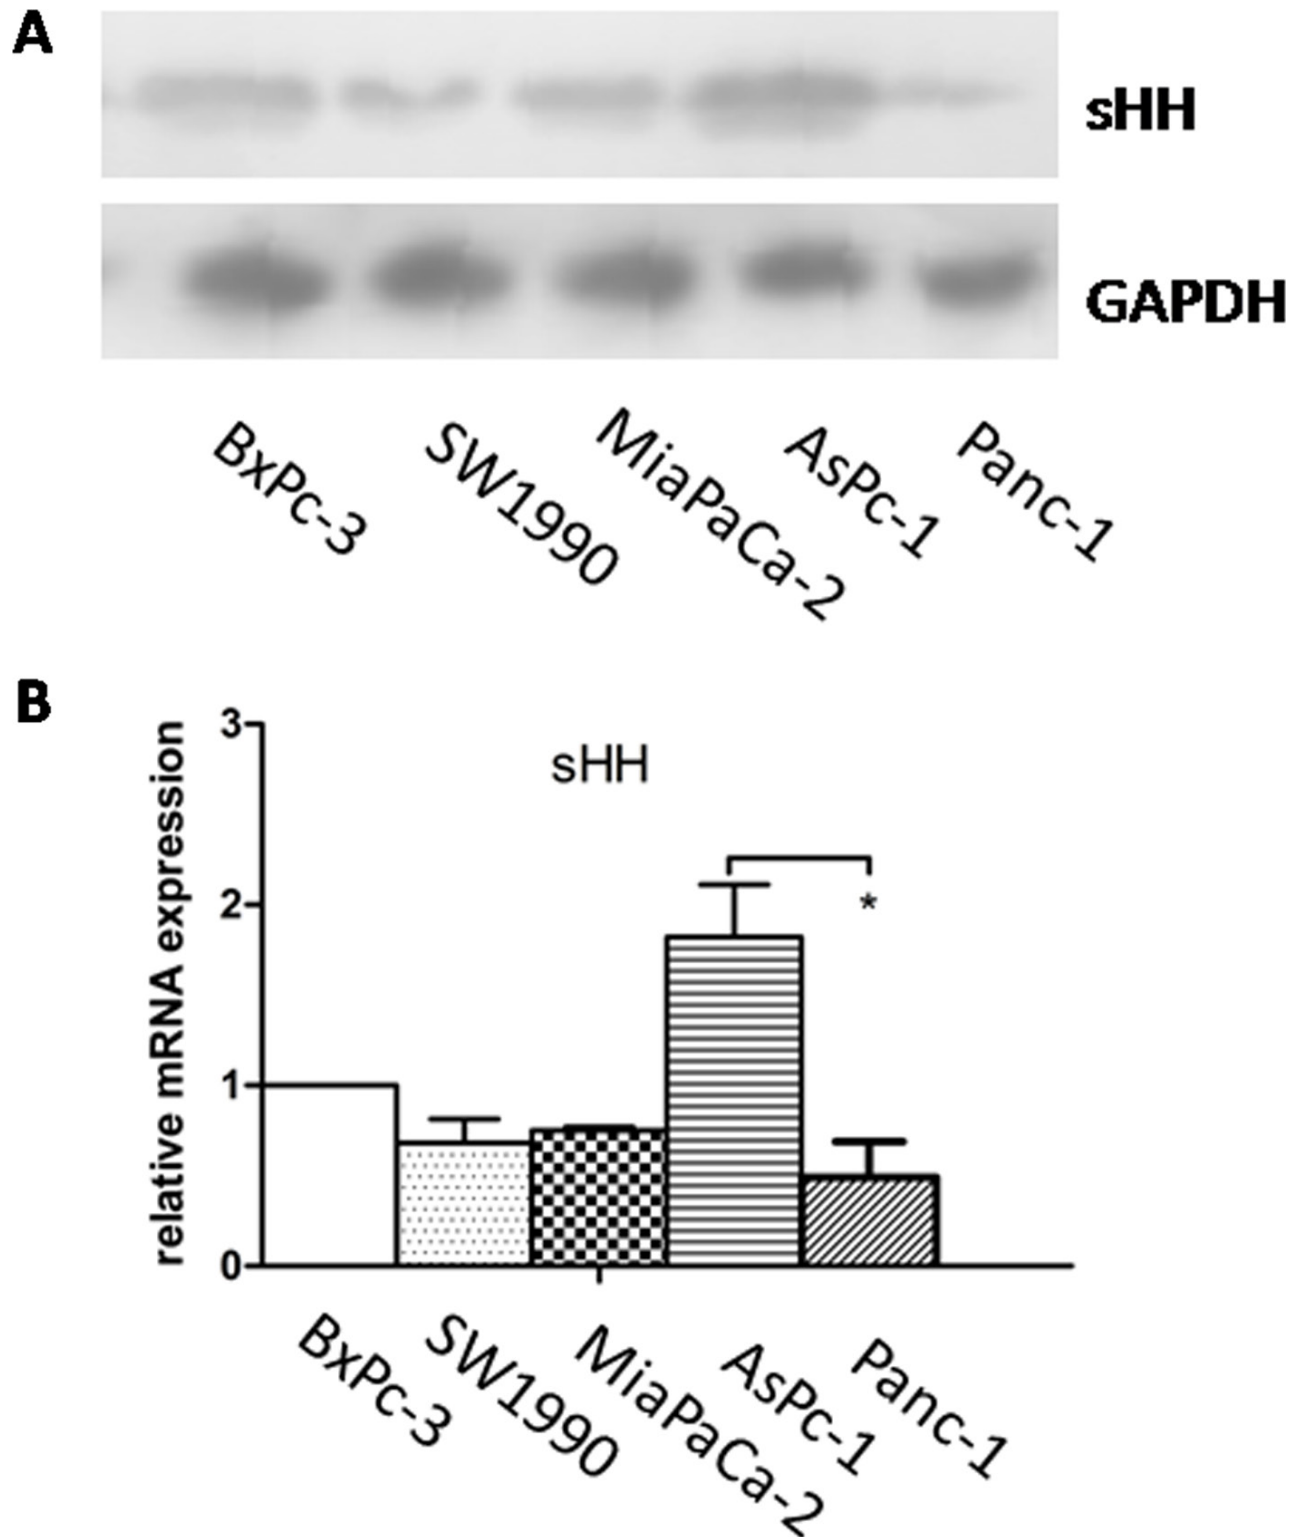

**Supplementary Figure S2: PC cell linescreening for further study based on expression of sHH.** (A) The protein expression of sHH in different PC cell lines. As seen, Panc-1 cells express low levels, and AsPc-1 cells express high levels of sHH. (B) The mRNA expression of sHH in different PC cell lines, which is similar to protein expression levels.

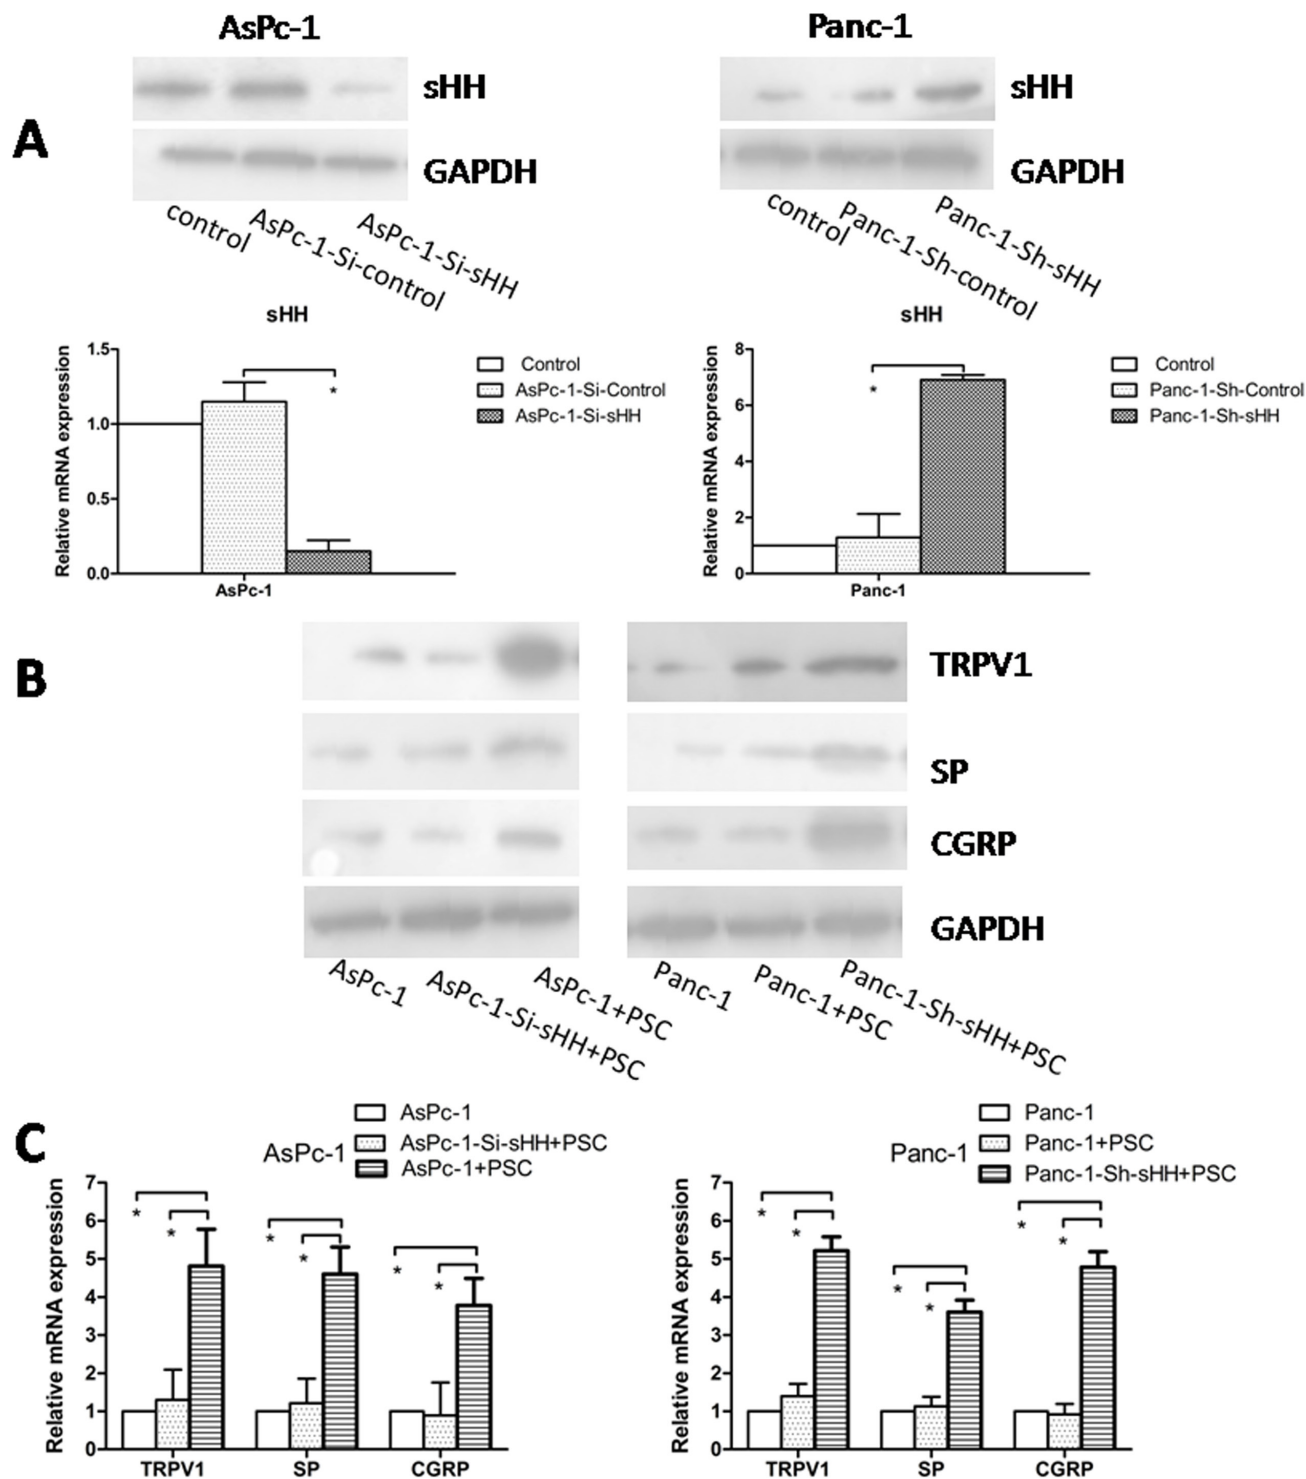

**Supplementary Figure S3: The effect of sHH-transfected PC cells on expression of TRPV1, SP, and CGRP in DRG in co-culture system.** (A) The transfection efficiencies were verified by real-time PCR and Western blotting. Panc-1 cells (low sHH expression) were transfected with sHH plasmids, and AsPc-1 cells (high sHH expression) were transfected with sHH siRNA. (B) The protein expression levels of TRPV1, SP and CGRP in the co-culture of AsPc-1-Si-sHH cells and PSCs were lower than those in the co-culture of AsPc-1 cells and PSCs. However, these levels were higher in co-cultured Panc-1-Sh-sHH cells and PSCs than in co-cultured Panc-1 cells and PSCs. (C) The mRNA expression changes of TRPV1, SP and CGRP in co-culture were similar to the protein results. ( $p < 0.05$ ). Panc-1-Sh-sHH: Panc-1 cells (low sHH expression) were stably transfected with sHH plasmids; AsPC-1-Si-sHH: AsPC-1 cells (high sHH expression) were transiently transfected with sHH siRNA.

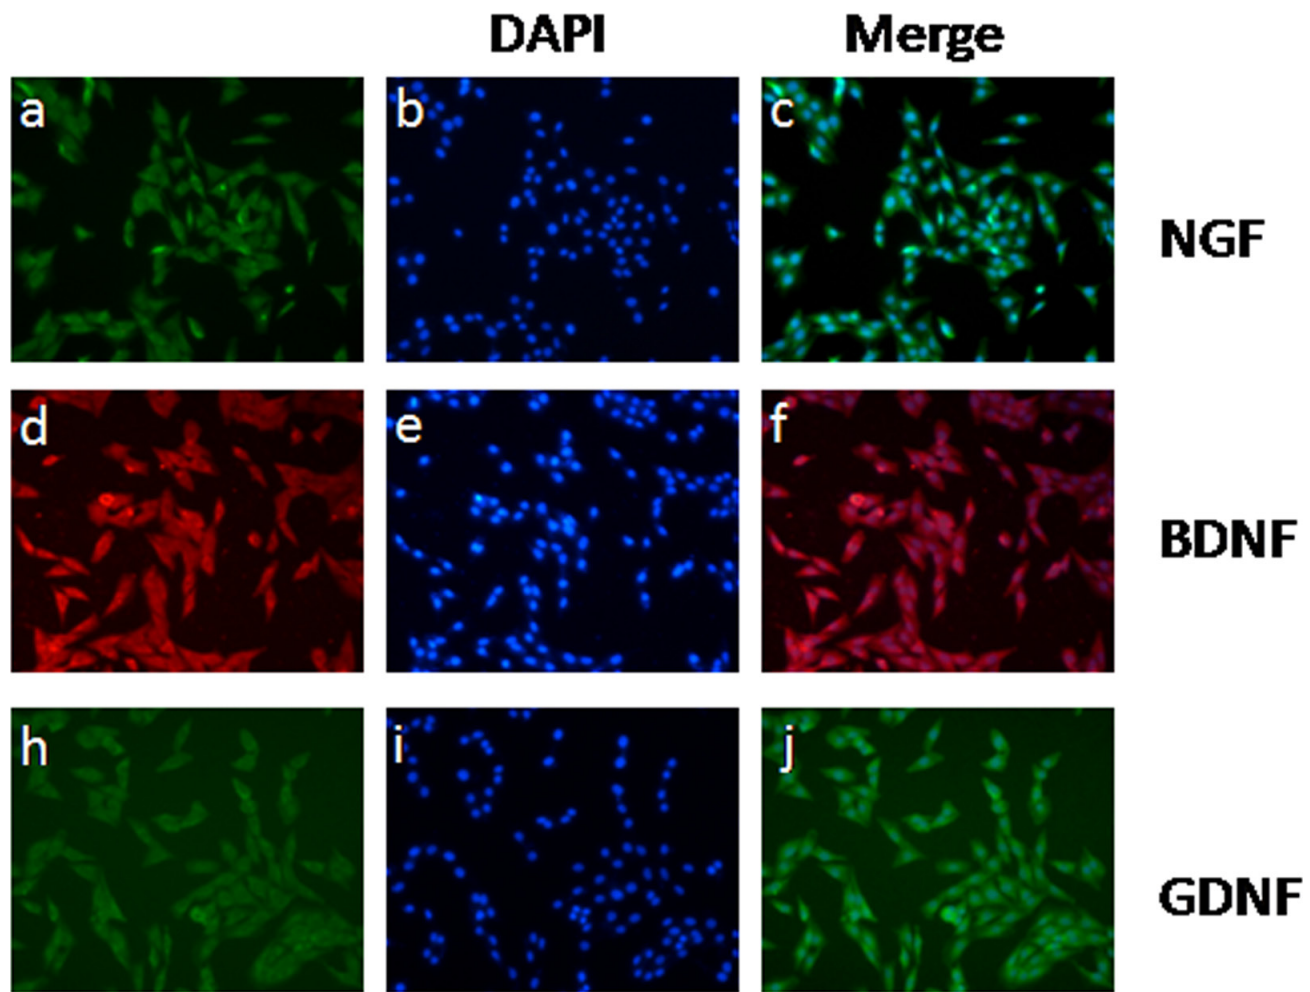

**Supplementary Figure S4: Staining of NGF, BDNF, and GDNF in PSCs.** (a,d,h) Expression of NGF (green), BDNF (red) and GDNF (green) in PSCs' cytoplasm, respectively. (b,e,i) Nuclear staining with DAPI. (c,f,j) Merge of staining is shown.

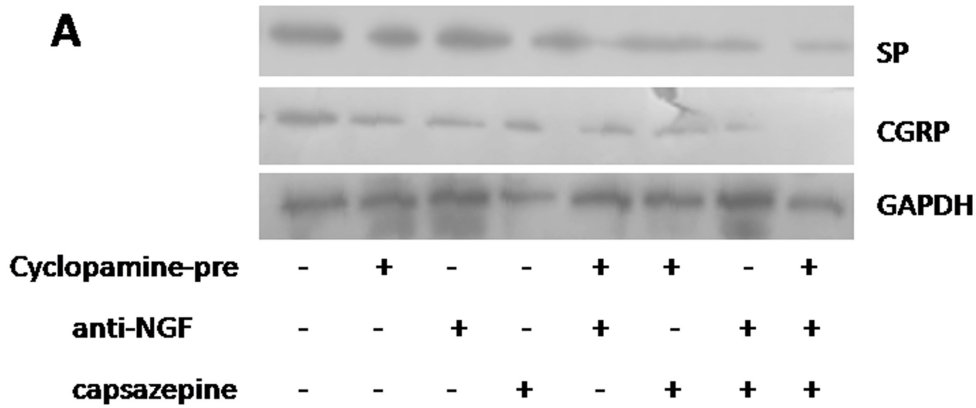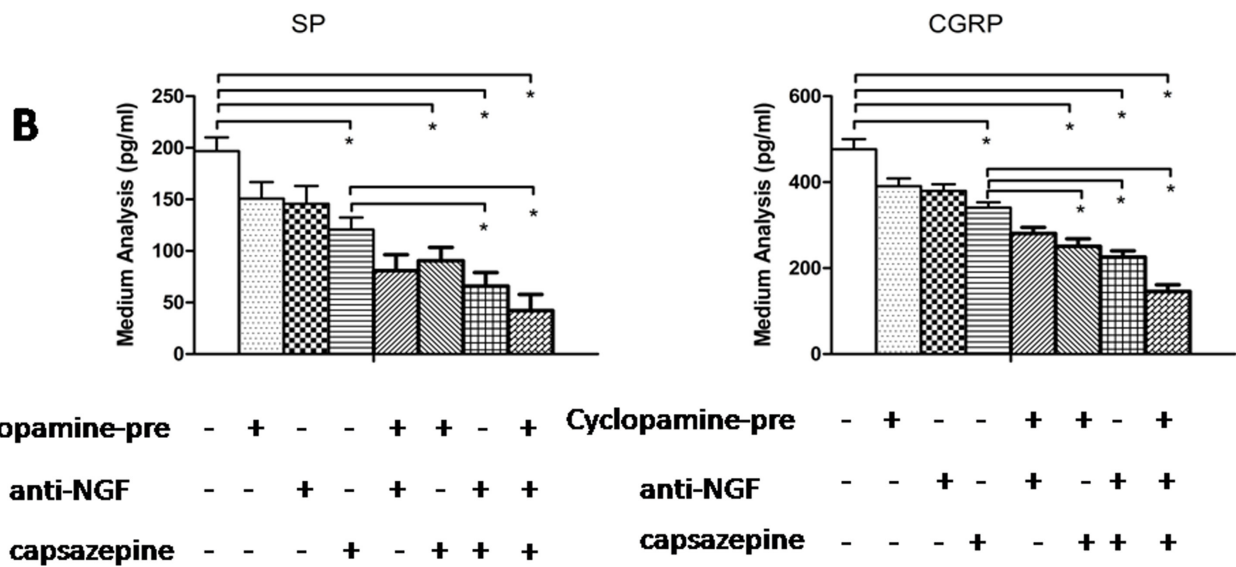

**Supplementary Figure S5: Antagonism of TRPV1 diminished SP and CGRP expression and secretion in DRG in co-culture system.** (A) Combined cyclopamine-pre and anti-NGF obviously reduced the expression of SP and CGRP compared with control or using either inhibitor alone ( $p < 0.05$ ). (B) The graph shows that the secretion of SP and CGRP was lower in the combination group than in the control group or with either individual inhibitor ( $p < 0.05$ ).

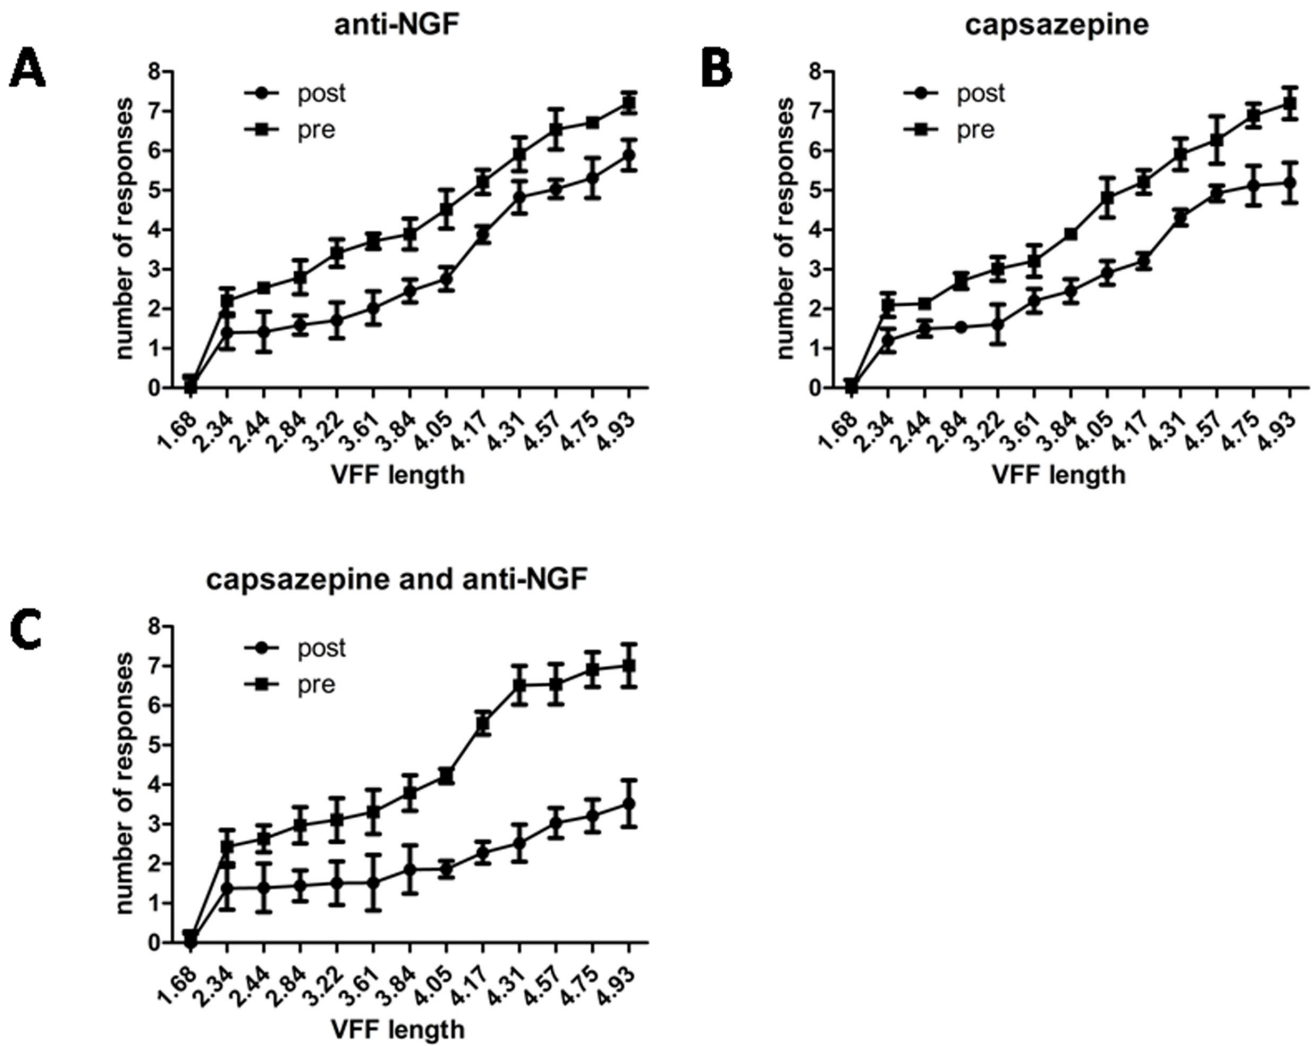

**Supplementary Figure S6: Anti-EGF or/and capsazepine reduced the sensitivity to mechanical stimulation in mice.** (A) Anti-NGF treatment attenuated behavioral responses. The neutralizing antibodies were intraperitoneally injected, and the sensitivity of the abdomen to mechanical stimulation was measured after 3 days. (B) Capsazepine treatment diminished behavioral responses. The methods are similar to those with anti-NGF. (C) Combining both anti-NGF and capsazepine obviously suppressed the pain-related behaviors.

**Supplementary Table S1: Real-time PCR primer sequence**

| Gene  | Primer Sequence                                                            |
|-------|----------------------------------------------------------------------------|
| SHH   | P1: 5'-GCTTCGACTGGGTGTAACG-3'<br>P2: 5'-GCCACCGAGTTCTCTGCT-3'              |
| BDNF  | P1: 5'-TGGCTGACACTTTCGAACAC-3'<br>P2: 5'-CCTCATGGACATGTTTGCAG-3'           |
| SP    | P1: 5'-GACTCCTCTGACCGCTAC-3'<br>P2: 5'-AGACCTGCTGGATGAACT-3'               |
| GDNF  | P1: 5'-AGGTCACCAGATAAACAAGCGG-3'<br>P2: 5'-TCACAGGAGCCGCTGCAATATC-3'       |
| TRPV1 | P1: 5'-CCCATTGTGCAGATTGAGCAT-3'<br>P2: 5'-TTCCTGCAGAAGAGCAAGAAGC-3'        |
| CGRP  | P1: 5'-AACCTTAGAAAGCAGCCCAGGCATG-3'<br>P2: 5'-GTGGGCACAAAGTTGTCCTTCACCA-3' |
| NGF   | P1: 5'-AAGGCTTTGCCAAGGACG-3'<br>P2: 5'-GTGATGTTGCGGGTCTGC-3'               |
| GAPDH | P1: 5'-ACCACAGTCCATGCCATCAC-3'<br>P2: 5'-TCCACCACCCTGTTGCTGTA-3'           |
